# Supplementary material
Source: PubMed Central journal article supplement (PMC3359894)
Supplement: supp_185.10.1073_Sze_ODS_May_15_rev.pdf [file supp_185.10.1073_Sze_ODS_May_15_rev.pdf]

## **The Lung Tissue Microbiome in Chronic Obstructive Pulmonary Disease**

Marc A. Sze, Pedro A. Dimitriu, Shizu Hayashi, W. Mark Elliott, John E. McDonough, John V. Gosselink, Joel Cooper, Don D. Sin, William W. Mohn, James C. Hogg

ONLINE DATA SUPPLEMENT

## **Online Supplement**

### **Lung Tissue Preparation and DNA Extraction**

After surgical removal lung tissue was frozen as soon as possible using previously published methods (1-3) and 1.5 x 2 cm (diameter x length) cores of this lung tissue were used. These frozen lung tissue cores were cut in a biosafety cabinet level two and approximately 30mg of tissue was taken from each lung sample for DNA extraction using the Qiagen DNeasy kit (Maryland, USA). The quality and quantity of DNA was assessed by Nanodrop (Delaware, USA) using OD 260/230, OD 260/280, and OD 260 readings (Table S1). Working aliquots of 1 part extracted DNA and 5 parts DNase and RNase free water for the DNA from non-smoking and smoking controls and COPD (GOLD 4) and 1 in 10 for cystic fibrosis (CF) patients were stored in a -20°C freezer while the undiluted stock DNA samples were stored in a -80 °C freezer.

### **Materials**

All PCR steps used Qiagen 10X PCR buffer, HotstarTaq DNA Polymerase, and dNTP mix. Primers were from SIGMA (Ontario, Canada). The QPCR assays on the ABI 7900HT Sequencing Detection System (California, USA) used 2x SYBR green PCR master mix (Qiagen). *E.coli* was grown within the lab on LB agar and extracted using the DNeasy Tissue and Blood extraction kit (Qiagen). PCR for both the TRFLP and pyrotag sequencing were performed using Bio-Rad My Cycler Thermal Cycler (California, USA). The *HhaI* restriction enzyme used in the TRFLP was from New England Biolabs (Massachusetts, USA). For the pyrotag sequencing primers, nucleotide sequences were provided by McGill University and Genome Quebec Innovation Centre and oligonucleotides bought from SIGMA. A range from 10.6 – 112.8 ng of total DNA was used in all PCR reactions.

## Subjects

Out of the 24 patients that comprised the non-smoking, smoking, and COPD (GOLD 4) group only 9 individuals had a complete medication history and none had information on co-morbidities available. Of these 9 individuals only three were on corticosteroids (1 smoker and 2 COPD (GOLD 4) patients). There was no significant difference in bacteria/1000 human cells between those receiving corticosteroids and those not that did not ( $P > 0.05$ ) (Table S2). None of these 9 patients received antibiotics. Of the 8 CF patients medication data was available for only 6. All 6 patients whose medication data was available were prescribed antibiotics.

## QPCR

To quantify total eubacteria, primers specifying the 293bp amplicon of the 16S rRNA gene (4)(Table S3) were applied with PCR cycling conditions that were modified from that reported previously (4) in the following manner: 95°C for 15 minutes then 40 cycles of 95°C for 30 seconds, and 63°C for 1 minute. These 40 cycles were then followed with a denaturing curve sequence. A serial dilution of DNA from *E.coli* was used to generate a standard curve (4). Total *E.coli* DNA, as measured by Nanodrop (Delaware, USA) was used to calculate the number of *E.coli* cells based on the genome size of 4.5 million bp. The standard curve for the 16S rRNA gene assay was  $y = -3.1638x + 36.373$  ( $R^2 = 0.99$ ).

The Rpp40 assay cycling conditions were 95°C for 15 minutes followed by 40 cycles of 95°C for 30 seconds and 60°C for 1 minute. The standard curve for the human Rpp40 gene assay was  $y = -3.7119x + 34.579$  ( $R^2 = 0.99$  for both). As with the 16S rRNA assay a denaturing curve sequence followed. Finally, a correction factor using the formula [(Average number of bacteria per sample – average number of bacteria in the negative control) / (number of Rpp40 copies/sample)] x 1000 = bacterial cells / 1000 human cells was applied. A *Lactobacillus* QPCR assay was performed to validate the signal found in the pyrotag sequencing. The assay used

*Lactobacillus/Lactococcus* specific 16S rDNA primers and cycling conditions that were previously published (5) with a standard curve based on the *Lactobacillus acidophilus* species DNA of  $y = -3.5037x + 33.197$  ( $R^2 = 0.9974$ ). The total *Lactobacillus* count was then normalized to the previously obtained total bacterial count for the respective sample to generate a percent abundance of *Lactobacillus*.

## **TRFLP**

### *PCR protocol*

Modifications of TRFLP (5, 6) used the restriction enzyme *HhaI* (6) to digest a fluorescently-labeled PCR product of 881bp spanning the hypervariable regions V1-V3 (7). The published PCR conditions (6) were modified to give an initial hot start step at 95°C for 15 minutes, followed by 40 cycles of 94°C for 40 seconds, 57°C for 30 seconds, and 72°C for 90 seconds. Primer sequences can be found on Table S4.

## **Pyrotag sequencing**

The conditions of the first round of the nested PCR were 95°C for 15 minutes followed by 40 cycles of 94°C for 40 seconds, 57°C for 30 seconds, and 72°C for 90 seconds. This was followed by the second round of PCR utilizing primers that amplified the 550bp sequence spanning the hypervariable regions V1-V3 (7) as described previously (8) with conditions (9) modified to 95°C for 15 minutes followed by 40 cycles of 94°C for 40 seconds, 61°C for 40 seconds and 72°C for 60 seconds. Primer design can be found on Table S5

Initial pyrotag sequencing without first round PCR (non-nested) yielded enough amplicons for the CF samples only. Thus a first round and second round PCR (nested PCR) were initiated.

Before the analysis of different sample groups were undertaken a comparison of the non-nested cystic fibrosis sequencing versus the nested PCR cystic fibrosis sequencing was completed. The first round nested consisted of the eight unique CF samples while the nested consisted of six of

these eight samples and two samples that were duplicates of these six. This was to assess whether or not there was a significant variation between repeated samples in the nested PCR. The two samples from the eight original samples that were excluded were chosen at random. There was no significant difference (Figure E1) between the cystic fibrosis non-nested samples and the cystic fibrosis nested samples with respect to clustering using a principle coordinate analysis ( $P > 0.05$ ). There was also no significant difference between the duplicate samples and the original or nested samples ( $P > 0.05$ ).

There were a total of 686,280 reads from the pooled pyrotag sequencing run. The total reads/sample for the non-smoking and smoking control and GOLD 4 ranged from 3181 – 17295; the CF group, 3265 – 64099; and the negative control group, 3134 – 10570. After sequence cleanup the total pooled pyrotag reads were 319,961. The reads/sample for the non-smoking and smoking control and GOLD 4 groups ranged from 3006 – 16784; the CF group 3260 – 64008; and the negative control group 3062 – 10568.

## **Pyrotag sequencing pipeline**

### *Sequence analysis*

Sequence processing was performed with mothur commands (10) except where indicated. The pipeline consisted of the following steps: (i) Reads having a quality score  $< 25$ , ambiguous bases, and homopolymers  $> 6$  bp were discarded. (ii) Tags containing the regions targeted by the bacterial primers were extracted from the high-quality reads with the software tool *V-Xtractor*, which implements Hidden Markov Models to locate specific hypervariable regions in 16S rRNA sequence collections (11). Because regions V1-V3 and V1-V2 produced comparable taxonomic profiles (based on classifying a subset of the sequences with the online Ribosomal Database Project *Classifier* tool), we selected the latter segment for all further analyses. (iii) Chimeric

sequences were identified and removed with *chimera.uchime* using the “reference=self” option. (iv) Pyrotags were taxonomically classified, using a bootstrap support threshold of 60%, with the naive Bayesian algorithm implemented in the *classify.seqs* command. The sequence collection against which we compared our reads was compiled from the 16S rRNA Greengenes database by trimming entries to regions V1-V3 with V-Xtractor. (v) Pyrosequences were strictly de-replicated, sorted first by abundance and then by length, and binned into operational taxonomic units (OTUs) with an improved version of the algorithm described by (12) which clusters sequences having less than  $k$  Levenshtein or edit distance values (13). In the implementation of this algorithm, the metric determines the number of deletions, insertions, or substitutions required to transform a *de novo* selected seed sequence into a query sequence. By sorting unique reads according to abundance, we ensured that clusters were seeded with sequences that are sequentially less likely to be error-inducing, minimizing the chance of recruiting reads into spurious OTUs (14). We selected a  $k$  of 7, resulting in OTUs delimited at a ~97% similarity threshold based on an average read length of 252 bp. Our method also [1] avoids the pitfalls associated with clustering algorithms that rely on multiple sequence alignments, which become unreliable when comparing taxa that span a broad divergence range (15); and [2] excludes homopolymeric counts, a major cause of errors in pyrosequencing data (16), in pair-wise similarity calculations. (vi) OTUs were assigned to a taxon, using the *classify.otu* routine, if at least 50% of the reads within the OTU shared the taxonomic string delineated by *classify.seqs*.

### *Statistical analysis*

To track changes in the composition of bacterial communities, we calculated pairwise Bray-Curtis ( $d_{BC}$ ) dissimilarities after square-root-transforming of relative OTU abundances. Bacterial community patterns were visualized with principal coordinates analyses (PCoA) of dissimilarity

matrices. The effect of sample groups —healthy smokers, healthy non-smokers, cystic fibrosis, COPD, and negative controls— on bacterial community composition was investigated with a permutational (non-parametric) multivariate analysis of variance (PERMANOVA; (17, 18)) on the basis of Bray-Curtis distances. The statistical significance of the one-way models was evaluated with unrestricted permutations of raw data ( $n = 9,999$ ).

To determine the strength of the association between OTUs and lung disease state, we applied a diagnostic species analysis to all disease state combinations as implemented in Gingko v. 1.7 (28). Rather than using the original IndVal approach, which would aid in identifying the group of samples (state) to which a species (OTU) is maximally associated (19), we chose the biserial correlation coefficient ( $r_{pb}$ ) as an index of association. This strategy allowed us to determine the degree of preference of an OTU for a given type compared to the remaining types (20). The significance of each indicator value was tested with 9,999 permutations. A false-discovery rate correction (*q*value; (21)) was applied to account for multiple comparisons

### **QPCR & Pyrotag Reproducibility**

Multiple QPCR of a COPD (GOLD 4) extracted DNA sample (different 30mg tissue piece) yielded similar numbers of total bacteria each time (43.2, 29.1, and 23.8 bacterial cells) and these values were not significantly different than the average of the COPD (GOLD 4) sample group ( $P > 0.05$ ). For the pyrotag sequencing two CF samples that went through the nested PCR were sequenced twice with good agreement between the two sequencing repeats (less than a 2% difference between relative abundance of the major phylad identified).

## References

1. Gosselink JV, Hayashi S, Chau E, Cooper J, Elliott WM, Hogg JC. Evaluation of small sample cDNA amplification for microdissected airway expression profiling in COPD. *COPD* 2007;4:91-105.
2. Gosselink JV, Hayashi S, Elliott WM, Xing L, Chan B, Yang L, Wright C, Sin DD, Pare PD, Pierce JA, Pierce RA, Patterson A, Cooper J, Hogg JC. Differential expression of tissue repair genes in the pathogenesis of chronic obstructive pulmonary disease. *Am J Respir Crit Care Med* 2010;181:1329-1335.
3. McDonough JE, Yuan R, Suzuki M, Seyednejad N, Elliott WM, Sanchez PG, Wright AC, Geffer WB, Litzky L, Coxson HO, Pare PD, Sin DD, Pierce RA, Woods JC, McWilliams AM, Mayo JR, Lam SC, Cooper JD, Hogg JC. The relationship between small airway obstruction and emphysema in chronic obstructive pulmonary disease. *N Engl J Med* 2011;365:1567-1575.
4. Hilty M, Burke C, Pedro H, Cardenas P, Bush A, Bossley C, Davies J, Ervine A, Poulter L, Pachter L, Moffatt MF, Cookson WOC. Disordered microbial communities in asthmatic airways. *PLOS One* 2010;5:1-9.
5. Ferreira RBR, Gill N, Willing BP, Antunes LCM, Russell S, Croxen MA, Finlay BB. The intestinal microbiota plays a role in *salmonella*-induced colitis independent of pathogen colonization. *PLOS One* 2011;6:1-11.
6. Liu W-T, Marsh TL, Cheng H, Forney LJ. Characterization of microbial diversity by determining terminal restriction fragment length polymorphisms of genes encoding 16S rRNA. *Appl and Environ Microbiol* 1997;63:4516-4522.
7. Neefs J-M, Van de Peer Y, Hendriks L, De Wachter R. Compilation of small ribosomal subunit RNA sequences. *Nucleic Acids Res* 1990;18Suppl:2237-2317.
8. Erb-Downward JR, Thompson DL, Han MK, Freeman CM, McCloskey L, Schmidt LA, Young VB, Toews GB, Curtis JL, Sundaram B, Martinez FJ, Huffnagle GB. Analysis of the lung microbiome in the "Healthy" Smoker and in COPD. *PLOS One* 2011;6:1-12.
9. Bailey MT, Dowd SE, Parry NMA, Galley JD, Schauer DB, Lyte M. Stressor exposure disrupts commensal microbial populations in the intestines and leads to increased colonization by *Citrobacter rodentium*. *Infect Immun* 2010;78:1509-1519.
10. Schloss PD, Westcott SL, Ryabin T, Hall JR, Hartmann M, Hollister EB, Lesniewski RA, Oakley BB, Parks DH, Robinson CJ, Sahl JW, Stres BB, Thanllinger GG, Horn DJ, Weber CF. Introducing Mothur: Open-source, platform-independent, community-supported software for describing and comparing microbial communities. *Appl Environ Microbiol* 2009;75:7537-7541.



11. Hartmann M, Howes CG, Abarenkov K, Mohn WW, Nilsson RH. V-Xtractor: An open-source, high-throughput software tool to identify and extract hypervariable regions of small subunit (16S/18S) ribosomal RNA gene sequences. *J Microbiol Methods* 2010;83:250-253.
12. Stoeck T, Behnke A, Christen R, Amaral-Zettler L, Rodriguez-Mora MJ, Chistoserdov A, Orsi W, Edgcomb VP. Massively parallel tag sequencing reveals the complexity of anaerobic marine protistan communities. *BMC Biol* 2009;7:72.
13. Levenshtein V. Binary codes capable of correcting deletions, insertions, and reversals. *Sov Phys Doklady* 1966;13:451-461
14. Huse SM, Welch DM, Morrison HG, Sogin ML. Ironing out the wrinkles in the rare biosphere through improved OTU clustering. *Environ Microbiol* 2010;12:1889-1898.
15. Schwarz R, Seibel PN, Rahmann S, Schoen C, Huenerberg M, Müller-Reible C, Dandekar T, Karchin R, Schultz J, Müller T. Detecting species-site dependencies in large multiple sequence alignments. *Nucleic Acids Res* 2009;37:5959-5968.
16. Kunin V, Engelbrektson A, Ochman H, Hugenholtz P. Wrinkles in the rare biosphere: Pyrosequencing errors can lead to artificial inflation of diversity estimates. *Environ Microbiol* 2010;12:118-123.
17. Anderson MJ. A new method for non-parametric multivariate analysis of variance. *Austral Ecology* 2001;26:32-46.
18. McArdle BH, Anderson MJ. Fitting multivariate models to community data: A comment on distance-based redundancy analysis. *Ecology* 2001;82:290-297.
19. Dufrene M, Legendre P. Species assemblages and indicator species: The need for a flexible asymmetrical approach. *Ecological Monographs* 1997;67:345-366.
20. De Cáceres M, Legendre P, Moretti M. Improving indicator species analysis by combining groups of sites. *Oikos* 2010;119:1674-1684.
21. Käll L, Storey JD, Noble WS. Quality: Non-parametric estimation of q-values and posterior error probabilities. *Bioinformatics* 2009;25:964-966.

Table E1: Nanodrop results for extracted DNA from each sample.

|                             | <b>Sample ID</b> | <b>ng/<math>\mu</math>L</b> | <b>OD 260</b> | <b>OD 260/280</b> | <b>OD 260/230</b> |
|-----------------------------|------------------|-----------------------------|---------------|-------------------|-------------------|
| <b>Non-Smoking Controls</b> | 1977             | 37                          | 0.75          | 1.81              | 1.33              |
|                             | 3037             | 134                         | 2.58          | 1.87              | 1.94              |
|                             | 3262             | 32                          | 0.64          | 1.84              | 1.26              |
|                             | 3480             | 75                          | 1.50          | 1.88              | 1.77              |
|                             | 5909             | 90                          | 1.81          | 1.92              | 1.90              |
|                             | 6376             | 34                          | 0.68          | 2.03              | 1.20              |
|                             | 6788             | 47                          | 0.96          | 1.91              | 1.38              |
|                             | 7180             | 38                          | 0.76          | 1.92              | 1.20              |
| <b>Smoking Controls</b>     | 2014             | 122                         | 2.18          | 1.88              | 1.64              |
|                             | 2431             | 13                          | 0.25          | 1.85              | 0.76              |
|                             | 5771             | 18                          | 0.37          | 1.87              | 1.04              |
|                             | 5882             | 94                          | 1.91          | 1.91              | 1.62              |
|                             | 6043             | 37                          | 0.74          | 2.02              | 1.38              |
|                             | 6077             | 34                          | 0.68          | 1.96              | 1.41              |
|                             | 6651             | 74                          | 1.48          | 1.92              | 1.52              |
|                             | 6894             | 72                          | 1.43          | 1.89              | 1.59              |
| <b>COPD (GOLD 4)</b>        | 6965             | 117                         | 2.34          | 1.97              | 2.06              |
|                             | 6967             | 84                          | 1.68          | 1.93              | 1.99              |
|                             | 6968             | 74                          | 1.49          | 1.97              | 1.87              |
|                             | 6969             | 31                          | 0.61          | 2.18              | 1.66              |
|                             | 6971             | 81                          | 1.63          | 1.96              | 1.85              |
|                             | 7013             | 81                          | 1.64          | 1.95              | 1.79              |
|                             | 7014             | 122                         | 2.42          | 1.94              | 1.70              |
|                             | 7015             | 15                          | 0.32          | 1.98              | 1.02              |
| <b>Cystic Fibrosis</b>      | 2877             | 157                         | 3.07          | 1.91              | 2.33              |
|                             | 5723             | 201                         | 4.01          | 1.99              | 2.30              |
|                             | 5894             | 333                         | 6.63          | 1.97              | 2.33              |
|                             | 5901             | 127                         | 2.55          | 1.92              | 2.31              |
|                             | 5915             | 152                         | 3.07          | 1.91              | 2.33              |
|                             | 5928             | 173                         | 3.42          | 1.89              | 2.26              |
|                             | 5938             | 221                         | 4.45          | 1.94              | 2.33              |
|                             | 6058             | 204                         | 4.02          | 1.94              | 2.38              |

**Table E2: Comparison of bacterial load and corticosteroid use**

|                                 | Corticosteroid Positive (n=3) | Corticosteroid Negative (n=6) |
|---------------------------------|-------------------------------|-------------------------------|
| Bacteria Cells/1000 Human Cells | 12.9 ± 12.7                   | 47.5 ± 53.3                   |

**Table E3: QPCR primer sequences.**

| Target        | Primer Sequence                     | Primer Name |
|---------------|-------------------------------------|-------------|
| 16S rRNA gene | 5' - GCAGGCCTAACACATGCAAGTC-3'      | 63F         |
|               | 5' - CTGCTGCCTCCCGTAGGAGT-3'        | 355R        |
| Rpp40 gene    | 5' - CGTAAGCAAGTTTAGTGAATACCTGAA-3' | Forward     |
|               | 5' - GCACAGCTTCCATCTTACTCAATC-3'    | Reverse     |

**Table E4: TRFLP primer sequences.**

| Target        | Primer Sequence              | Primer Name |
|---------------|------------------------------|-------------|
| 16S rRNA gene | 5' - AGAGTTTGATCMTGGCTCAG-3' | 8F          |
|               | 5' - CCGTCAATTCMTTGGAGTTT-3' | 926R        |

**Table E5: Pyrotag PCR primer sequences**

| Target                                       | Primer Sequence                        | Primer Name |
|----------------------------------------------|----------------------------------------|-------------|
| 16S rRNA gene<br>(1 <sup>st</sup> Round PCR) | 5' - AGAGTTTGATCMTGGCTCAG-3'           | 8F          |
|                                              | 5' - CCGTCAATTCMTTGGAGTTT-3'           | 926R        |
| 16S rRNA gene<br>(2 <sup>nd</sup> Round PCR) | 5' - X...-N...-AGAGTTTGATCMTGGCTCAG-3' | 8F          |
|                                              | 5' - X...- GWATTACCGCGGCKGCTG-3'       | 519R        |

X = sequence used to attach amplicons to bead sequencing system, N = unique identifier nucleotide sequence assigned to each sample

**Table E6: The Top 150 aligned OTU's based on the total abundance of all sequence reads obtained after sequence cleanup.**

| <b>OTU</b> | <b>Total Abundance</b> | <b>Taxon</b>                             |
|------------|------------------------|------------------------------------------|
| 1          | 73597                  | <i>Bordetella hinzii</i>                 |
| 2          | 33723                  | Flavobacteriaceae unclassified           |
| 3          | 26356                  | <i>Aquabacterium</i> unclassified        |
| 4          | 15054                  | <i>Pseudomonas</i> unclassified          |
| 5          | 10880                  | <i>Acidovorax</i> unclassified           |
| 6          | 13626                  | Burkholderiales unclassified             |
| 7          | 10315                  | <i>Diaphorobacter</i> unclassified       |
| 8          | 9535                   | <i>Pseudomonas geniculata</i>            |
| 9          | 7017                   | <i>Aggregatibacter aphrophilus</i>       |
| 10         | 6319                   | <i>Prevotella oris</i>                   |
| 11         | 5036                   | <i>Novosphingobium</i> unclassified      |
| 12         | 4623                   | <i>Burkholderia</i> unclassified         |
| 13         | 6115                   | <i>Brevundimonas mediterranea</i>        |
| 14         | 4260                   | <i>Streptococcus constellatus</i>        |
| 15         | 3935                   | <i>Corynebacterium</i> unclassified      |
| 16         | 3595                   | <i>Lactobacillus</i> unclassified        |
| 17         | 3580                   | <i>Burkholderia multivorans</i>          |
| 18         | 3393                   | <i>Propionibacterium acnes</i>           |
| 19         | 4142                   | <i>Pedobacter</i> unclassified           |
| 20         | 3954                   | <i>Caulobacter leidyia</i>               |
| 21         | 3255                   | Sphingobacteriales unclassified          |
| 22         | 2065                   | <i>Allobaculum</i> unclassified          |
| 23         | 1963                   | <i>Flavobacterium</i> unclassified       |
| 24         | 1861                   | mle1-12 unclassified                     |
| 25         | 1741                   | Bacteroidales unclassified               |
| 26         | 1603                   | Rhodocyclaceae unclassified              |
| 27         | 2206                   | <i>Actinomyces</i> unclassified          |
| 28         | 1505                   | <i>Lactobacillus</i> unclassified        |
| 29         | 1401                   | <i>Arcicella</i> unclassified            |
| 30         | 1887                   | <i>Methylobacterium populi</i>           |
| 31         | 1290                   | <i>Sphingobium</i> unclassified          |
| 32         | 1205                   | <i>Bacteroides acidifaciens</i>          |
| 33         | 1095                   | <i>Psychrobacter</i> unclassified        |
| 34         | 1025                   | <i>Roseateles</i> unclassified           |
| 35         | 989                    | <i>Staphylococcus aureus</i>             |
| 36         | 990                    | Candidatus <i>Rhodoluna</i> unclassified |
| 37         | 946                    | Bacteroidales unclassified               |
| 38         | 911                    | Rhodocyclaceae unclassified              |

|    |     |                                   |
|----|-----|-----------------------------------|
| 39 | 847 | Gemmata unclassified              |
| 40 | 839 | Sphingomonas unclassified         |
| 41 | 803 | Clostridium unclassified          |
| 42 | 779 | Acidovorax caeni                  |
| 43 | 771 | Burkholderiales unclassified      |
| 44 | 710 | Acinetobacter unclassified        |
| 45 | 706 | Sphingomonadaceae unclassified    |
| 46 | 653 | Bradyrhizobium unclassified       |
| 47 | 604 | Brevundimonas diminuta            |
| 48 | 604 | Streptococcus pseudopneumoniae    |
| 49 | 682 | Sphingobacteriales unclassified   |
| 50 | 559 | Lachnospiraceae unclassified      |
| 51 | 556 | Pedobacter unclassified           |
| 52 | 520 | Ochrobactrum unclassified         |
| 53 | 533 | Chromatiales unclassified         |
| 54 | 532 | Prevotella unclassified           |
| 55 | 525 | Chryseobacterium unclassified     |
| 56 | 491 | Erythrobacteraceae unclassified   |
| 57 | 490 | Rhodoplanes unclassified          |
| 58 | 479 | Bacteroidales unclassified        |
| 59 | 467 | Blastococcus unclassified         |
| 60 | 450 | Allobaculum sp ID4                |
| 61 | 447 | Bacteroidales unclassified        |
| 62 | 436 | Candidatus_Odyssella unclassified |
| 63 | 419 | Acinetobacter unclassified        |
| 64 | 408 | Pseudomonas mendocina             |
| 65 | 407 | ACK-M1 unclassified               |
| 66 | 404 | Corynebacterium unclassified      |
| 67 | 406 | Mycobacterium unclassified        |
| 68 | 409 | Agrococcus jenensis               |
| 69 | 397 | Sphingomonas azotifigens          |
| 70 | 394 | Methylobacterium adhaesivum       |
| 71 | 393 | mle1-12 unclassified              |
| 72 | 394 | Sphingobacteriales unclassified   |
| 73 | 391 | Alcaligenaceae unclassified       |
| 74 | 376 | Enterococcus cecorum              |
| 75 | 368 | Polaromonas unclassified          |
| 76 | 353 | Prevotella unclassified           |
| 77 | 346 | Hylemonella unclassified          |
| 78 | 344 | Xanthomonas unclassified          |
| 79 | 310 | Prevotella melaninogenica         |

|     |     |                                |
|-----|-----|--------------------------------|
| 80  | 314 | Microbacterium aurum           |
| 81  | 304 | Chryseobacterium unclassified  |
| 82  | 311 | Sphingobium unclassified       |
| 83  | 298 | Comamonas unclassified         |
| 84  | 296 | Capnocytophaga sputigena       |
| 85  | 289 | Actinomycetospora unclassified |
| 86  | 288 | Ralstonia unclassified         |
| 87  | 258 | Pseudochrobactrum unclassified |
| 88  | 323 | Burkholderiales unclassified   |
| 89  | 383 | Bosea vestrisii                |
| 90  | 254 | Methylobacterium unclassified  |
| 91  | 251 | Lactobacillus iners            |
| 92  | 248 | Oxalobacteraceae unclassified  |
| 93  | 235 | Micrococcus antarcticus        |
| 94  | 233 | Rhizobiales unclassified       |
| 95  | 228 | Pseudomonas stutzeri           |
| 96  | 227 | Microbacteriaceae unclassified |
| 97  | 223 | Hydrogenophilus unclassified   |
| 98  | 276 | Burkholderiales unclassified   |
| 99  | 218 | Staphylococcus unclassified    |
| 100 | 217 | Flavobacterium unclassified    |
| 101 | 216 | Bacteroides unclassified       |
| 102 | 213 | Paracoccus marcusii            |
| 103 | 209 | Chryseobacterium unclassified  |
| 104 | 209 | Lachnospiraceae unclassified   |
| 105 | 205 | Corynebacterium durum          |
| 106 | 203 | Beijerinckiaceae unclassified  |
| 107 | 202 | Bacillus unclassified          |
| 108 | 200 | Novosphingobium unclassified   |
| 109 | 262 | Pelomonas puraquae             |
| 110 | 198 | Parabacteroides distasonis     |
| 111 | 198 | Kocuria palustris              |
| 112 | 195 | Parvimonas micra               |
| 113 | 189 | Bacteroidales unclassified     |
| 114 | 186 | Rhodoplanes unclassified       |
| 115 | 184 | Pseudomonas unclassified       |
| 116 | 183 | Rhodopseudomonas unclassified  |
| 117 | 181 | Streptococcus unclassified     |
| 118 | 184 | Flavobacteriaceae unclassified |
| 119 | 177 | Rhodospirillaceae unclassified |
| 120 | 175 | Lachnospiraceae unclassified   |

|     |     |                                |
|-----|-----|--------------------------------|
| 121 | 171 | Gordonia polyisoprenivorans    |
| 122 | 172 | Sporosarcina unclassified      |
| 123 | 175 | Xanthomonadaceae unclassified  |
| 124 | 170 | Rhodocyclales unclassified     |
| 125 | 173 | Pedobacter unclassified        |
| 126 | 167 | Neisseria unclassified         |
| 127 | 148 | Pseudomonas unclassified       |
| 128 | 167 | Patulibacteraceae unclassified |
| 129 | 168 | Nocardioides unclassified      |
| 130 | 155 | Lachnospiraceae unclassified   |
| 131 | 150 | Staphylococcus epidermidis     |
| 132 | 151 | Bacteroidales unclassified     |
| 133 | 149 | Janibacter limosus             |
| 134 | 147 | Clostridium unclassified       |
| 135 | 147 | Spirosoma unclassified         |
| 136 | 145 | Methylophilus unclassified     |
| 137 | 136 | Lactobacillus reuteri          |
| 138 | 135 | Oxalobacteraceae unclassified  |
| 139 | 135 | Roseomonas unclassified        |
| 140 | 131 | Dermacoccus unclassified       |
| 141 | 131 | Prevotella unclassified        |
| 142 | 131 | Clostridium unclassified       |
| 143 | 129 | Thermicanus unclassified       |
| 144 | 131 | Nocardioides alkalitolerans    |
| 145 | 125 | Mucispirillum unclassified     |
| 146 | 119 | Clostridium unclassified       |
| 147 | 113 | Clostridium unclassified       |
| 148 | 111 | Agrobacterium unclassified     |
| 149 | 111 | Stramenopiles unclassified     |
| 150 | 108 | Lachnospiraceae unclassified   |

**Table E7: Top 52 bacterial species based on indicator species analysis with P value < 0.05. Listed in order of lowest P-value for each sample group.**

| Sample Group        | Species Name                  | Biserial Correlation Coefficient | P-value | Q-value  |
|---------------------|-------------------------------|----------------------------------|---------|----------|
| COPD (GOLD 4)       | Lactobacillus Unclassified    | 0.69101                          | 0.0003  | 0.011299 |
| COPD (GOLD 4)       | Burkholderia Unclassified     | 0.6489                           | 0.0004  | 0.014123 |
| COPD (GOLD 4)       | Lactobacillus Unclassified    | 0.68462                          | 0.0007  | 0.023262 |
| COPD (GOLD 4)       | Lactobacillus Unclassified    | 0.6078                           | 0.0008  | 0.025108 |
| COPD (GOLD 4)       | Burkholderiales Unclassified  | 0.61993                          | 0.0024  | 0.07136  |
| COPD (GOLD 4)       | Bacteroidales Unclassified    | 0.52069                          | 0.0104  | 0.234045 |
| COPD (GOLD 4)       | Allobaculum sp ID4            | 0.49339                          | 0.0116  | 0.234045 |
| COPD (GOLD 4)       | Allobaculum Unclassified      | 0.52738                          | 0.0141  | 0.274675 |
| COPD (GOLD 4)       | Lactobacillus reuteri         | 0.51136                          | 0.0156  | 0.291883 |
| COPD (GOLD 4)       | Bacteroides acidifaciens      | 0.51366                          | 0.0169  | 0.291883 |
| COPD (GOLD 4)       | Burkholderia Unclassified     | 0.52097                          | 0.0178  | 0.291883 |
| COPD (GOLD 4)       | Acinetobacter Unclassified    | 0.38883                          | 0.0182  | 0.291883 |
| COPD (GOLD 4)       | Burkholderiales Unclassified  | 0.49329                          | 0.021   | 0.312201 |
| COPD (GOLD 4)       | Bacteroidales Unclassified    | 0.48038                          | 0.0359  | 0.405884 |
| COPD (GOLD 4)       | Allobaculum Unclassified      | 0.47403                          | 0.0364  | 0.405884 |
| COPD (GOLD 4)       | Lactobacillus Unclassified    | 0.43042                          | 0.0393  | 0.405884 |
| COPD (GOLD 4)       | Lactobacillus Unclassified    | 0.47295                          | 0.0393  | 0.405884 |
| COPD (GOLD 4)       | Burkholderia heleaia          | 0.48038                          | 0.0393  | 0.405884 |
| COPD (GOLD 4)       | Bacteroides acidifaciens      | 0.48038                          | 0.0399  | 0.405884 |
| COPD (GOLD 4)       | Bacteroides acidifaciens      | 0.48038                          | 0.0399  | 0.405884 |
| COPD (GOLD 4)       | Bacteroides acidifaciens      | 0.48038                          | 0.0399  | 0.405884 |
| COPD (GOLD 4)       | Burkholderiales Unclassified  | 0.48038                          | 0.0404  | 0.405884 |
| COPD (GOLD 4)       | Caulobacter Unclassified      | 0.37953                          | 0.0406  | 0.405884 |
| COPD (GOLD 4)       | Staphylococcus hominis        | 0.47295                          | 0.0406  | 0.405884 |
| COPD (GOLD 4)       | Oscillospira Unclassified     | 0.39413                          | 0.0407  | 0.405884 |
| COPD (GOLD 4)       | Caulobacteraceae Unclassified | 0.45266                          | 0.0411  | 0.405884 |
| COPD (GOLD 4)       | Bacteroidales Unclassified    | 0.47295                          | 0.0411  | 0.405884 |
| COPD (GOLD 4)       | Lactobacillus Unclassified    | 0.47295                          | 0.0423  | 0.405884 |
| Smoking Control     | Aquabacterium Unclassified    | 0.50939                          | 0.0115  | 0.234045 |
| Smoking Control     | Rhodocyclaceae Unclassified   | 0.43033                          | 0.0424  | 0.405884 |
| Smoking Control     | Acidovorax caeni              | 0.52223                          | 0.0496  | 0.424557 |
| Non-Smoking Control | Comamonadaceae Unclassified   | 0.6083                           | 0.0032  | 0.09039  |
| Non-Smoking Control | Comamonadaceae Unclassified   | 0.55322                          | 0.0038  | 0.102226 |
| Non-Smoking Control | Brevundimonas diminuta        | 0.53428                          | 0.0103  | 0.234045 |
| Non-Smoking Control | Diaphorobacter Unclassified   | 0.49996                          | 0.0114  | 0.234045 |
| Non-Smoking Control | Comamonadaceae Unclassified   | 0.51732                          | 0.0172  | 0.291883 |
| Non-Smoking Control | Hylemonella Unclassified      | 0.45193                          | 0.0174  | 0.291883 |
| Non-Smoking Control | Acidovorax Unclassified       | 0.46682                          | 0.0202  | 0.308424 |



|                     |                                |         |        |          |
|---------------------|--------------------------------|---------|--------|----------|
| Non-Smoking Control | Comamonadaceae Unclassified    | 0.45968 | 0.0246 | 0.356344 |
| Non-Smoking Control | Flavobacterium Unclassified    | 0.4581  | 0.0374 | 0.405884 |
| Non-Smoking Control | Burkholderiales Unclassified   | 0.4504  | 0.0386 | 0.405884 |
| Non-Smoking Control | Flavobacteriaceae Unclassified | 0.42184 | 0.0433 | 0.405884 |
| Non-Smoking Control | Bradyrhizobiaceae Unclassified | 0.52223 | 0.045  | 0.405884 |
| Non-Smoking Control | Rhizobiales Unclassified       | 0.38754 | 0.0453 | 0.405884 |
| Non-Smoking Control | Rhodopseudomonas Unclassified  | 0.36609 | 0.0457 | 0.405884 |
| Non-Smoking Control | Burkholderia unclassified      | 0.51404 | 0.0466 | 0.405884 |
| Non-Smoking Control | Acidovorax Unclassified        | 0.40674 | 0.0467 | 0.405884 |
| Cystic Fibrosis     | Pseudomonas Unclassified       | 0.54776 | 0.0064 | 0.164345 |
| Cystic Fibrosis     | Pseudomonas Unclassified       | 0.52855 | 0.0083 | 0.203868 |
| Cystic Fibrosis     | Alcaligenaceae Unclassified    | 0.54825 | 0.0186 | 0.291883 |
| Cystic Fibrosis     | Alcaligenaceae Unclassified    | 0.47414 | 0.0314 | 0.405884 |
| Cystic Fibrosis     | Pseudomonadaceae Unclassified  | 0.4765  | 0.0382 | 0.405884 |

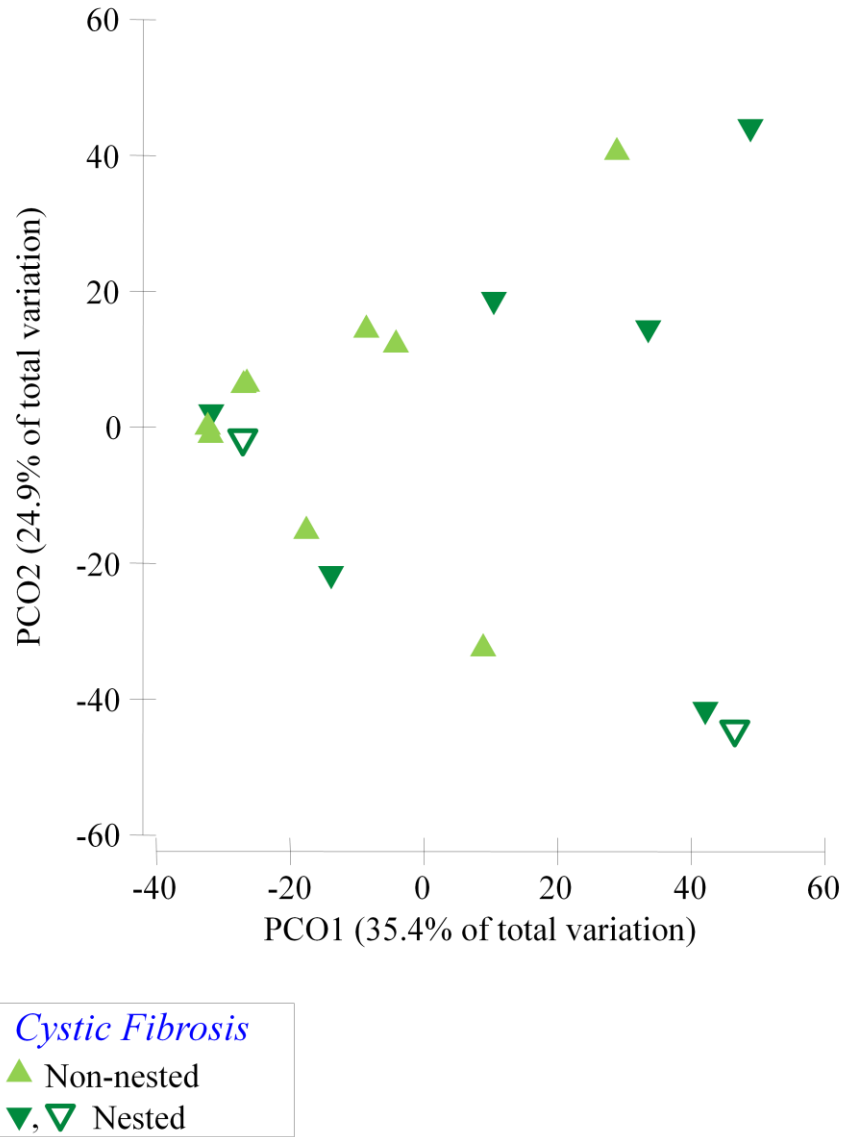

**Figure E1: Principle co-ordinate analysis of the nested and non-nested sequencing of the cystic fibrosis samples. The nested samples consisted of 6 unique samples and 2 technical replicates (duplicates of two of the 6 unique samples). Dark green upside-down triangles represents the duplicate of the nested sample closest to it.**

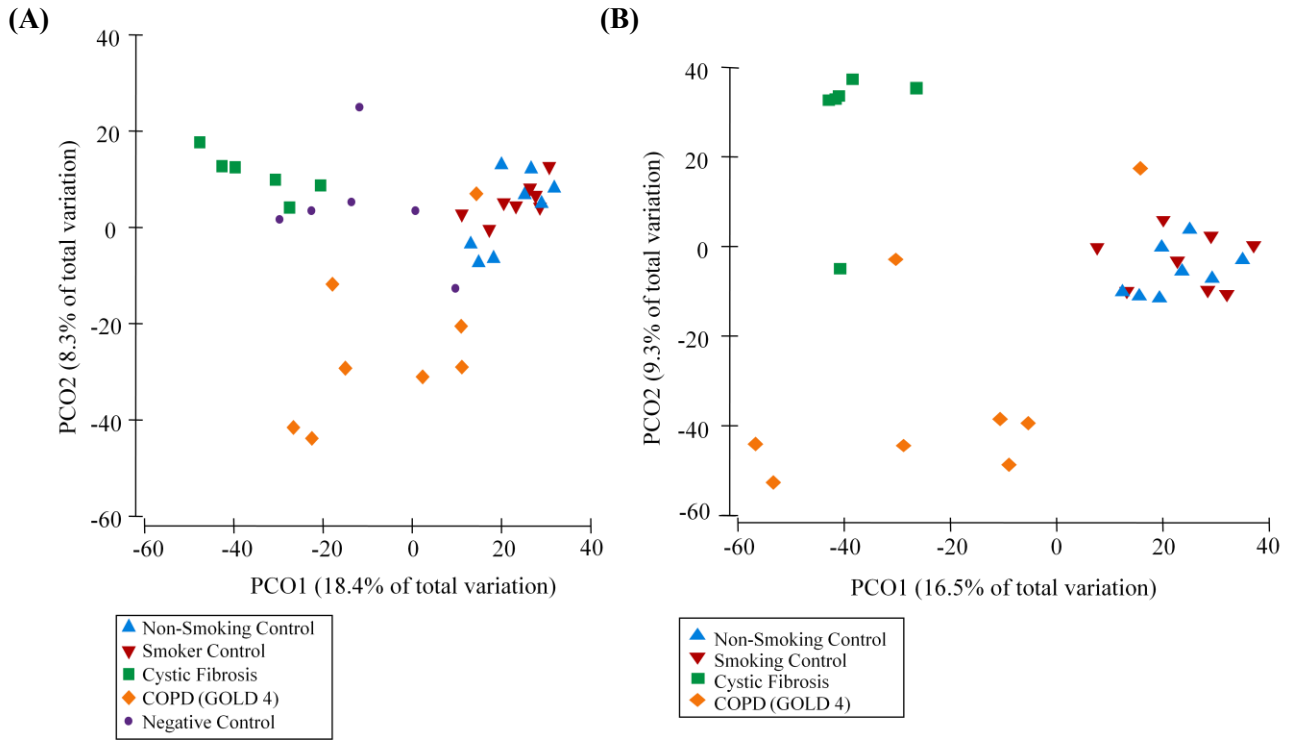

**Figure E2: Principle coordinate analysis of pyrotag sequencing results both without subtraction of the OTUs that shared three or greater percent similarity to reads from the negative controls (A) and with subtraction of the negative controls (B). Lung sample groups: n=8, negative controls and cystic fibrosis: n=6.**

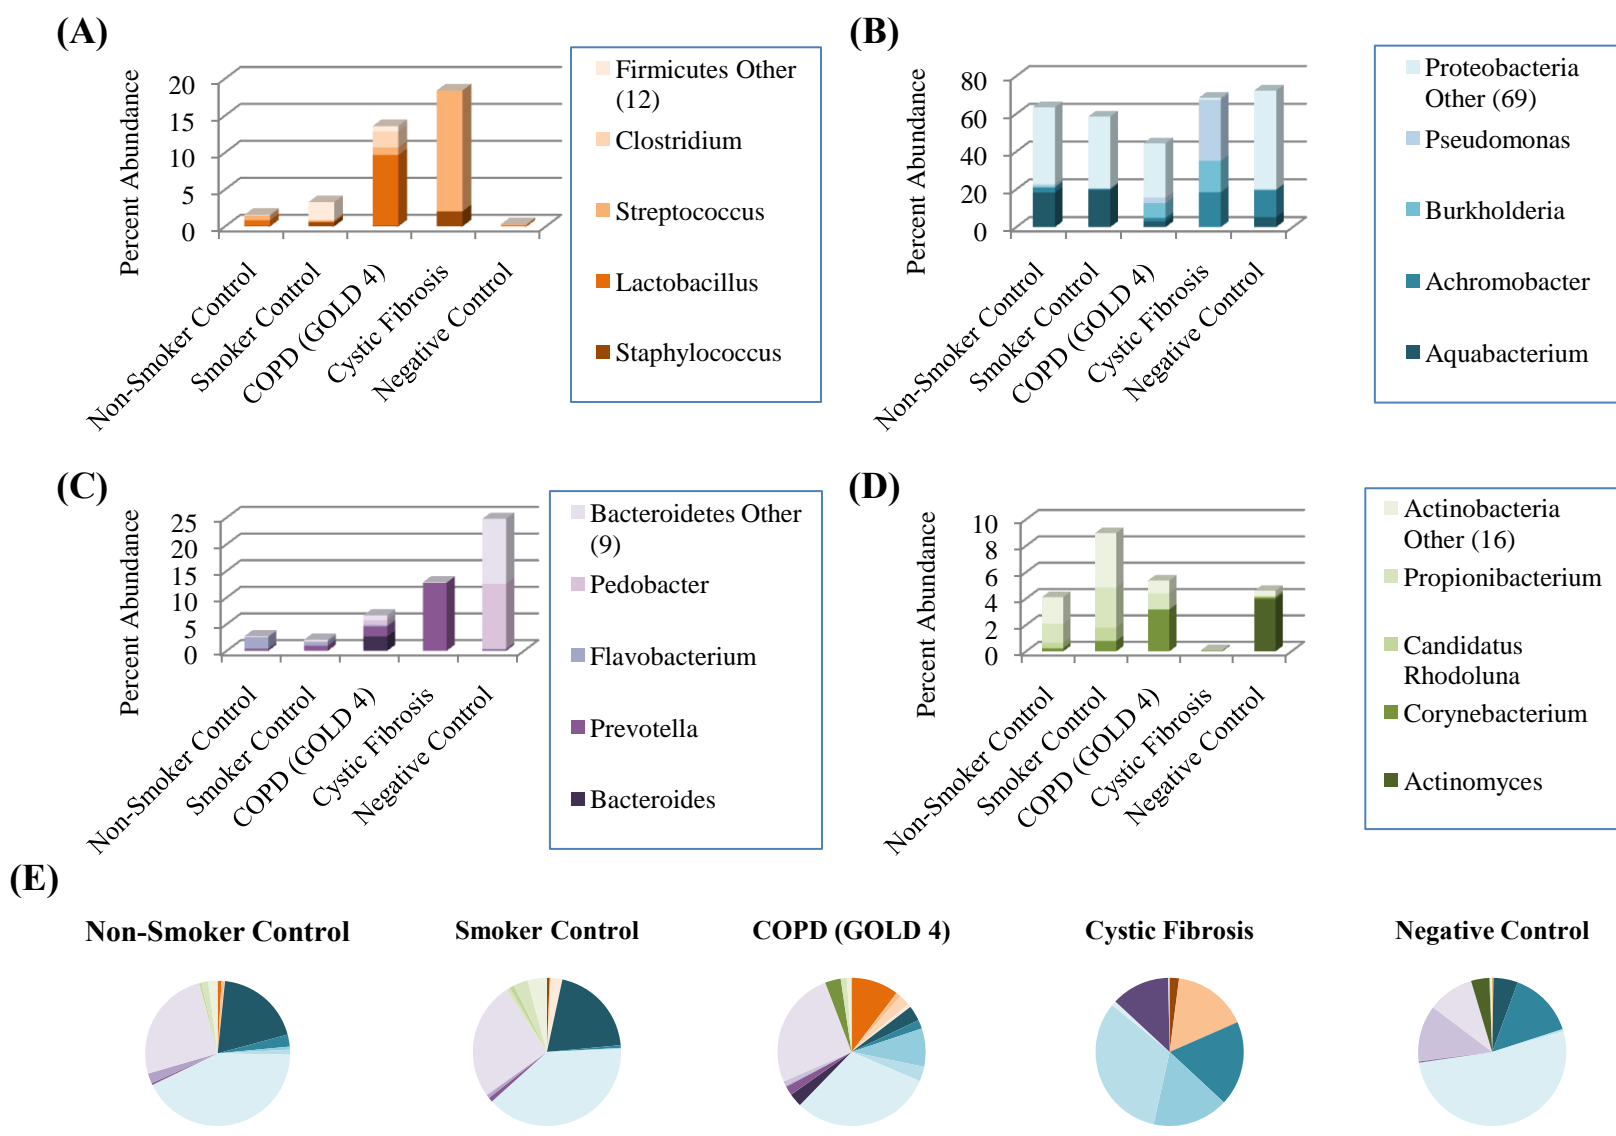

**Figure E3: The percent abundance in each sample group of the top 5 genera of the four the major bacterial phyla. A.) The Firmicute phylum. B.) The Proteobacteria phylum. C.) The Bacteroidetes phylum. D.) The Actinobacteria phylum. E.) Pie chart showing overall distribution of the top 5 genera for all phyla in each sample group with colours of each genus corresponding to those used in A, B, C, and D.**

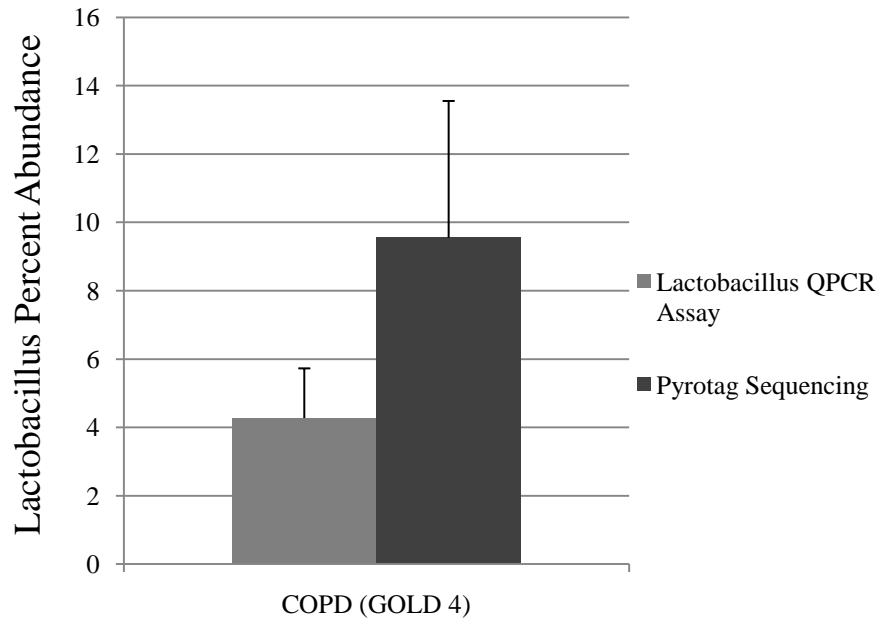

**Figure E4: Comparison between pyrotag sequencing and QPCR assay results for *Lactobacillus* in the COPD (GOLD 4) group. There was no significant difference between the two different measurements ( $P>0.05$ ).**
